# Supplementary material
Source: MDPI journal article supplement (https://www.mdpi.com/2306-5729/9/4/59)
Supplement: s1 [file s1]

Archive with 4 entries (4 files):
- Figure S1_PRISMA ARTICLES (1).pdf
- Supplementary Files (1) (1).pdf
- Table S1-Research strings (1).pdf
- Table S2-Initiative and sources (1).pdf
