# Supplementary material
Source: MDPI journal article supplement (https://www.mdpi.com/2306-5729/9/4/59)
Supplement: s1 [file s1]

**Table S1:** Research strings

| Number | Search string                                                                                                                                                                                                                                   |
|--------|-------------------------------------------------------------------------------------------------------------------------------------------------------------------------------------------------------------------------------------------------|
| 1      | (((((data[Title/Abstract]) AND (repositor*[Title/Abstract])) AND (archiv*[Title/Abstract])) AND (clinical[Title/Abstract])) AND (dataset[Title/Abstract])) AND (infrastructure[Title/Abstract]) Filters: in the last 10 years, English Sort by: |
| 2      | ((Data sharing[Title/Abstract] OR Data-sharing[Title/Abstract]) AND (repositor*[Title/Abstract])) AND (data[Title/Abstract]) Filters: in the last 10 years, English                                                                             |
| 3      | ((((archiv*[Title/Abstract]) AND (sharing[Title/Abstract])) AND (data[Title/Abstract])) AND (storage[Title/Abstract]) Filters: in the last 10 years, English                                                                                    |
| 4      | (((((clinical data[Title/Abstract]) AND (platform[Title/Abstract])) AND (reuse[Title/Abstract])) AND (individual participant data[Title/Abstract])) AND (data-sharing[Title/Abstract])) AND (data reuse[Title/Abstract])                        |
| 5      | (((((data[Title/Abstract]) AND (database[Title/Abstract])) AND (archiv*[Title/Abstract])) AND (repositor*[Title/Abstract])) AND (dataset*[Title/Abstract]) Filters: in the last 10 years, English                                               |
| 6      | (((((Data commons[Title/Abstract]) AND (data[Title/Abstract])) AND (sharing[Title/Abstract])) AND (dataset[Title/Abstract])) AND (clinical data[Title/Abstract]) Filters: in the last 10 years, English                                         |
| 7      | (((((Data[Title/Abstract]) AND (data-sharing[Title/Abstract])) AND (platform[Title/Abstract]) OR (repositor*[Title/Abstract])) AND (clinical trial[Title/Abstract])) Filters: in the last 10 years, English                                     |
| 8      | (((((Pediatric[Title/Abstract]) AND (patient[Title/Abstract])) AND (data commons[Title/Abstract])) AND (Children[Title/Abstract])) AND (platform[Title/Abstract])) AND (data-sharing[Title/Abstract]) Filters: in the last 10 years, English    |
| 9      | (((((Data commons[Title/Abstract]) AND (storing[Title/Abstract])) AND (sharing[Title/Abstract])) AND (clinical data[Title/Abstract])) AND (patients[Title/Abstract]) Filters: in the last 10 years, English                                     |
| 10     | ((((Database[Title/Abstract]) AND (clinical trials[Title/Abstract])) AND (patients[Title/Abstract])) AND (Individual patient-level data[Title/Abstract]) Filters: in the last 10 years, English                                                 |
