# Supplementary material
Source: MDPI journal article supplement (https://www.mdpi.com/2306-5729/9/4/59)
Supplement: s1 [file s1]

## Supplementary Files

Research questions:

- Question: What is the type of data considered? Answer: data; data commons; clinical data; Individual Participant; Individual patient-level data.
- Question: What is the source of the data? Answer: clinical trial; trials.
- Question: What is the target population? Answer: children; pediatric; patients.
- Question: What is the research object? Answer: platform\*; repositor\*; archiv\*; dataset; infrastructure.
- Question: What is the approach to data management? Answer: data reuse; sharing; data-sharing; data sharing; storage; storing.

Google search keywords list

Data, clinical trials, trials, initiative, network, pediatric, repositor\*.

**Table S1:** Research strings

| Number | Search string                                                                                                                                                                                                                                   |
|--------|-------------------------------------------------------------------------------------------------------------------------------------------------------------------------------------------------------------------------------------------------|
| 1      | (((((data[Title/Abstract]) AND (repositor*[Title/Abstract])) AND (archiv*[Title/Abstract])) AND (clinical[Title/Abstract])) AND (dataset[Title/Abstract])) AND (infrastructure[Title/Abstract]) Filters: in the last 10 years, English Sort by: |
| 2      | ((Data sharing[Title/Abstract] OR Data-sharing[Title/Abstract]) AND (repositor*[Title/Abstract])) AND (data[Title/Abstract]) Filters: in the last 10 years, English                                                                             |
| 3      | ((archiv*[Title/Abstract]) AND (sharing[Title/Abstract])) AND (data[Title/Abstract]) AND (storage[Title/Abstract]) Filters: in the last 10 years, English                                                                                       |
| 4      | (((((clinical data[Title/Abstract]) AND (platform[Title/Abstract])) AND (reuse[Title/Abstract])) AND (individual participant data[Title/Abstract])) AND (data-sharing[Title/Abstract])) AND (data reuse[Title/Abstract])                        |
| 5      | (((((data[Title/Abstract]) AND (database[Title/Abstract])) AND (archiv*[Title/Abstract])) AND (repositor*[Title/Abstract])) AND (dataset*[Title/Abstract]) Filters: in the last 10 years, English                                               |

|    |                                                                                                                                                                                                                                              |
|----|----------------------------------------------------------------------------------------------------------------------------------------------------------------------------------------------------------------------------------------------|
| 6  | ((((Data commons[Title/Abstract]) AND (data[Title/Abstract])) AND (sharing[Title/Abstract])) AND (dataset[Title/Abstract])) AND (clinical data[Title/Abstract]) Filters: in the last 10 years, English                                       |
| 7  | ((((Data[Title/Abstract]) AND (data-sharing[Title/Abstract])) AND (platform[Title/Abstract]) OR (repositor*[Title/Abstract])) AND (clinical trial[Title/Abstract])) Filters: in the last 10 years, English                                   |
| 8  | (((((Pediatric[Title/Abstract]) AND (patient[Title/Abstract])) AND (data commons[Title/Abstract])) AND (Children[Title/Abstract])) AND (platform[Title/Abstract])) AND (data-sharing[Title/Abstract]) Filters: in the last 10 years, English |
| 9  | ((((Data commons[Title/Abstract]) AND (storing[Title/Abstract])) AND (sharing[Title/Abstract])) AND (clinical data[Title/Abstract])) AND (patients[Title/Abstract]) Filters: in the last 10 years, English                                   |
| 10 | ((((Database[Title/Abstract]) AND (clinical trials[Title/Abstract])) AND (patients[Title/Abstract])) AND (Individual patient-level data[Title/Abstract]) Filters: in the last 10 years, English                                              |

**Figure S1:** Flow diagram for the selection of articles from literature

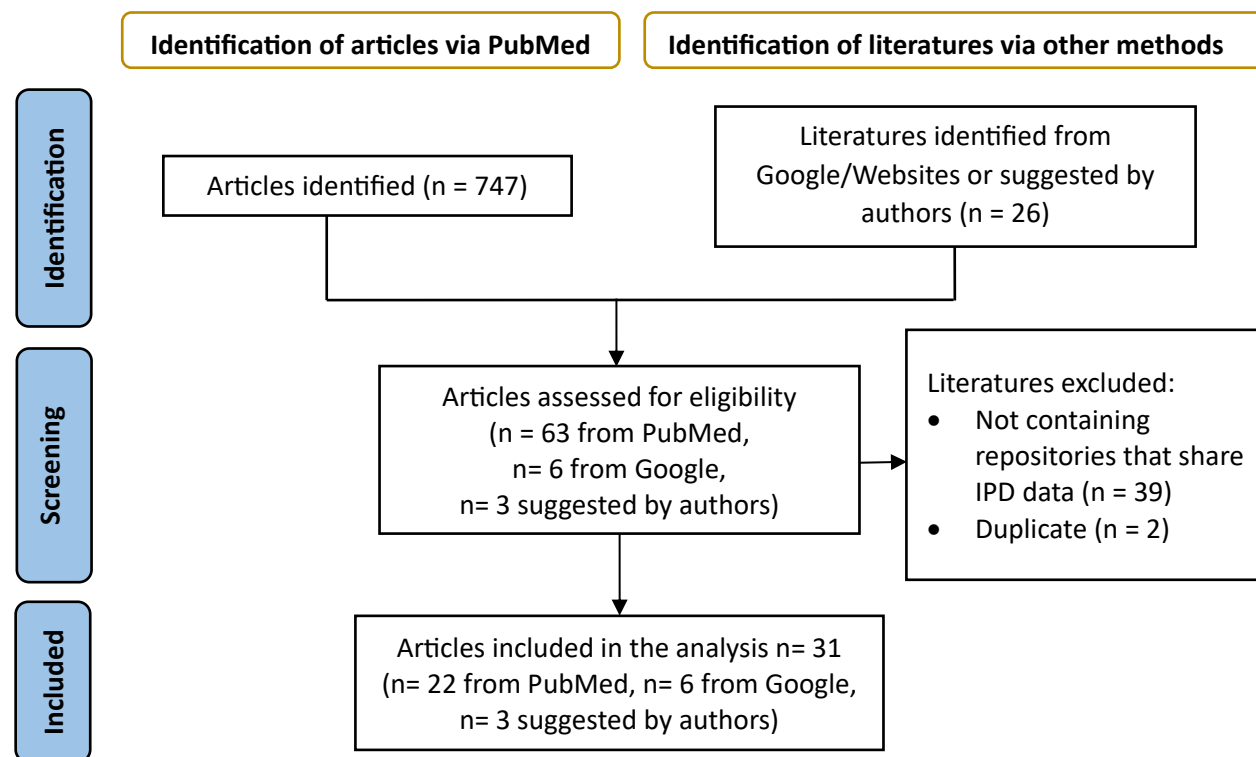

**Table S2:** List of initiatives and sources from which DSRs have been identified

| N | Initiative name                       | Source                   |
|---|---------------------------------------|--------------------------|
| 1 | BioCelerate (TransCelerate)           | Suggested by the authors |
| 2 | BioLINCC                              | PubMed                   |
| 3 | ClinicalStudyDataRequest (CSDR)       | PubMed                   |
| 4 | Dryad Digital Repository              | PubMed                   |
| 5 | European Genome-phenome Archive (EGA) | PubMed                   |

|    |                                                                                             |                          |
|----|---------------------------------------------------------------------------------------------|--------------------------|
| 6  | Health Data Research Innovation Gateway                                                     | Suggested by the authors |
| 7  | Infectious Diseases Data Observatory (IDDO)                                                 | PubMed                   |
| 8  | Immunology Database and Analysis Portal (ImmPort)                                           | PubMed                   |
| 9  | Immune Tolerance Network (ITN) TrialShare                                                   | Suggested by the authors |
| 10 | Laboratory of Neuroimaging Image & Data Archive (IDA)                                       | PubMed                   |
| 11 | National Institute on Drug Abuse (NIDA)                                                     | Google                   |
| 12 | National Institute of Diabetes and Digestive and kidney Diseases (NIDDK) Central Repository | PubMed                   |
| 13 | National Sleep Research Resource (NSRR)                                                     | PubMed                   |
| 14 | Pediatric Cancer Data Commons (PCDC)                                                        | PubMed                   |
| 15 | Paediatric Trials Network (PTN)                                                             | Google                   |
| 16 | Project Data Sphere (PDS)                                                                   | PubMed                   |
| 17 | Rare Disease Cures Accelerator – Data Analytical Platform (RDCA-DAP)                        | PubMed                   |
| 18 | The National Cancer Institute's Genomic Data Commons (GDC)                                  | PubMed                   |
| 19 | The National Institute of Mental Health Data Archive (NIMH)                                 | PubMed                   |
| 20 | Vivli                                                                                       | PubMed                   |
| 21 | YODA project                                                                                | PubMed                   |
