# Supplementary material
Source: MDPI journal article supplement (https://www.mdpi.com/2306-5729/9/4/59)
Supplement: s1 [file s1]

**Table S2:** List of initiatives and sources from which DSRs have been identified

| <b>N</b> | <b>Initiative name</b>                                                                      | <b>Source</b>            |
|----------|---------------------------------------------------------------------------------------------|--------------------------|
| 1        | BioCelerate (TransCelerate)                                                                 | Suggested by the authors |
| 2        | BioLINCC                                                                                    | PubMed                   |
| 3        | ClinicalStudyDataRequest (CSDR)                                                             | PubMed                   |
| 4        | Dryad Digital Repository                                                                    | PubMed                   |
| 5        | European Genome-phenome Archive (EGA)                                                       | PubMed                   |
| 6        | Health Data Research Innovation Gateway                                                     | Suggested by the authors |
| 7        | Infectious Diseases Data Observatory (IDDO)                                                 | PubMed                   |
| 8        | Immunology Database and Analysis Portal (ImmPort)                                           | PubMed                   |
| 9        | Immune Tolerance Network (ITN) TrialShare                                                   | Suggested by the authors |
| 10       | Laboratory of Neuroimaging Image & Data Archive (IDA)                                       | PubMed                   |
| 11       | National Institute on Drug Abuse (NIDA)                                                     | Google                   |
| 12       | National Institute of Diabetes and Digestive and kidney Diseases (NIDDK) Central Repository | PubMed                   |
| 13       | National Sleep Research Resource (NSRR)                                                     | PubMed                   |
| 14       | Pediatric Cancer Data Commons (PCDC)                                                        | PubMed                   |
| 15       | Paediatric Trials Network (PTN)                                                             | Google                   |
| 16       | Project Data Sphere (PDS)                                                                   | PubMed                   |
| 17       | Rare Disease Cures Accelerator – Data Analytical Platform (RDCA-DAP)                        | PubMed                   |
| 18       | The National Cancer Institute's Genomic Data Commons (GDC)                                  | PubMed                   |
| 19       | The National Institute of Mental Health Data Archive (NIMH)                                 | PubMed                   |
| 20       | Vivli                                                                                       | PubMed                   |

|    |              |        |
|----|--------------|--------|
| 21 | YODA project | PubMed |
|----|--------------|--------|
