# Supplementary material
Source: MDPI journal article supplement (https://www.mdpi.com/2306-5729/9/4/59)

**Figure S1:** Flow diagram for the selection of articles from literature

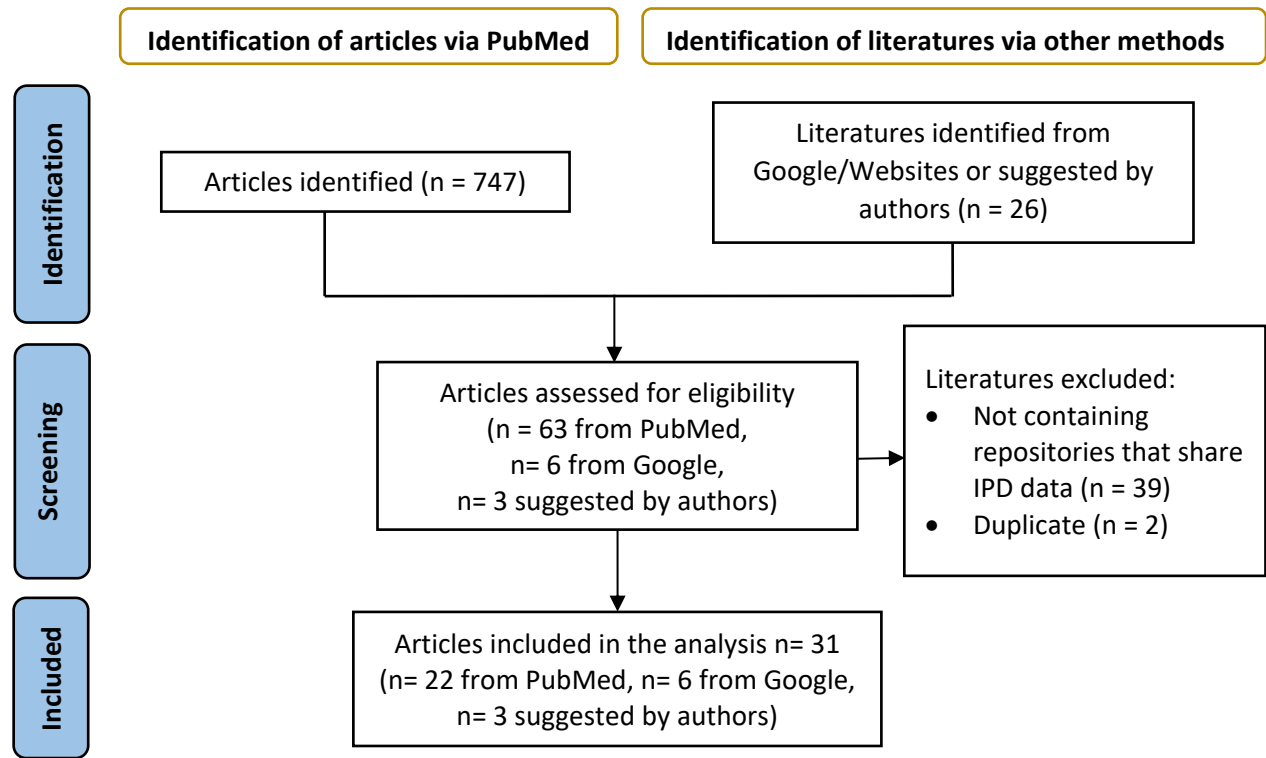

Supplement: s1 [file s1]
